# Supplementary material for: On the Relation between the General Affective Meaning and the Basic Sublexical, Lexical, and Inter-lexical Features of Poetic Texts—A Case Study Using 57 Poems of H. M. Enzensberger
Source: PubMed Central journal article supplement (PMC5225144; doi:10.3389/fpsyg.2016.02073), 2017-01-11
Supplement: Table1.pdf [file Table1.pdf]

1 **Supplementary material of the research article**  
2 **“On the relation between the general affective meaning and the basic sublexical, lexical and**  
3 **inter-lexical features of poetic texts – A case study using fifty-seven poems of H. M.**  
4 **Enzensberger”**

5 **Table S1: Full listing and description of all predictor variables of the multiple regression**  
6 **approach**

- 7
- 8 (1) sigma factor of lexical valence
  - 9 (2) absolute value of the sigma factor of lexical valence
  - 10 (3) sigma factor of lexical arousal
  - 11 (4) absolute value of the sigma factor of lexical arousal
  - 12 (5) minimum of lexical valence
  - 13 (6) maximum of lexical valence
  - 14 (7) valence span (max – min)
  - 15 (8) minimum of lexical arousal
  - 16 (9) maximum of lexical arousal
  - 17 (10) arousal span (max – min)
  - 18 (11) standard deviation of lexical valence
  - 19 (12) standard deviation of lexical arousal
  - 20 (13) correlation coefficient of word position and arousal
  - 21 (14) absolute value of the correlation coefficient of word position and arousal
  - 22 (15) correlation coefficient of word position and valence
  - 23 (16) absolute value of the correlation coefficient of word position and valence
  - 24 (17) correlation coefficient of word position and the absolute value of valence
  - 25 (18) absolute value of the correlation coefficient of word position and the absolute value of  
26 valence
  - 27 (19) total number of words per poem
  - 28 (20) total n of salient onsets only
  - 29 (21) total n of salient nuclei only
  - 30 (22) total n of salient codas only
  - 31 (23) total n of all salient subsyllabic segments together

- 32 (24) sigma factor of sublexical valence for salient onsets  
33 (25) sigma factor of sublexical valence for salient nuclei  
34 (26) sigma factor of sublexical valence for salient codas  
35 (27) sigma factor of sublexical valence for all salient segments  
36 (28) sigma factor of sublexical arousal for salient onsets  
37 (29) sigma factor of sublexical arousal for salient nuclei  
38 (30) sigma factor of sublexical arousal for salient codas  
39 (31) sigma factor of sublexical arousal for all salient segments  
40 (32) absolute value of the sigma factor of sublexical valence for salient onsets  
41 (33) absolute value of the sigma factor of sublexical valence for salient nuclei  
42 (34) absolute value of the sigma factor of sublexical valence for salient codas  
43 (35) absolute value of the sigma factor of sublexical valence for all salient segments  
44 (36) absolute value of the sigma factor of sublexical arousal for salient onsets  
45 (37) absolute value of the sigma factor of sublexical arousal for salient nuclei  
46 (38) absolute value of the sigma factor of sublexical arousal for salient codas  
47 (39) absolute value of the sigma factor of sublexical arousal for all salient segments  
48 (40) sigma factor of sublexical valence of all onsets  
49 (41) sigma factor of sublexical valence of all nuclei  
50 (42) sigma factor of sublexical valence of all codas  
51 (43) sigma factor of sublexical valence of all segments  
52 (44) sigma factor of sublexical arousal of all onsets  
53 (45) sigma factor of sublexical arousal of all nuclei  
54 (46) sublexical arousal of all codas  
55 (47) sublexical arousal of all segments  
56 (48) absolute value of the sigma factor of sublexical valence of all onsets  
57 (49) absolute value of the sigma factor of sublexical valence of all nuclei  
58 (50) absolute value of the sigma factor of sublexical valence of all codas  
59 (51) absolute value of the sigma factor of sublexical valence of all segments  
60 (52) absolute value of the sigma factor of sublexical arousal of all onsets  
61 (53) absolute value of the sigma factor of sublexical arousal of all nuclei  
62 (54) absolute value of the sublexical arousal of all codas  
63 (55) absolute value of the sublexical arousal of all segments
